# Supplementary material for: Terpenoids from the Marine-Derived Fungus Aspergillus fumigatus YK-7
Source: MDPI journal article supplement (doi:10.3390/molecules21010031), 2015-12-28
Supplement: s1 [file s1]

# Supplementary Materials: Terpenoids from the Marine-Derived Fungus *Aspergillus fumigatus* YK-7

Yu Wang <sup>1</sup>, Da-Hong Li <sup>2,3</sup>, Zhan-Lin Li <sup>2,3</sup>, Yan-Jun Sun <sup>4</sup>, Hui-Ming Hua <sup>2,3</sup>, Tao Liu <sup>1,\*</sup> and Jiao Bai <sup>2,3,\*</sup>

Figure S1. HR-ESI-MS spectrum of compound 1.

Figure S2. <sup>1</sup>H-NMR (300 MHz, CDCl<sub>3</sub>) of compound 1.

Figure S3. <sup>13</sup>C-NMR (75 MHz, CDCl<sub>3</sub>) of compound 1.

Figure S4. <sup>1</sup>H-<sup>1</sup>H COSY (600 MHz, CDCl<sub>3</sub>) of compound 1.

Figure S5. HSQC (600 MHz, CDCl<sub>3</sub>) of compound 1.

Figure S6. HMBC (600 MHz, CDCl<sub>3</sub>) of compound 1.

Figure S7. NOESY (600 MHz, CDCl<sub>3</sub>) of compound 1.

Figure S8. IR spectrum of compound 1.

Figure S9. HR-ESI-MS spectrum of compound 2.

Figure S10. <sup>1</sup>H-NMR (300 MHz, CDCl<sub>3</sub>) of compound 2.

Figure S11. <sup>13</sup>C-NMR (75 MHz, CDCl<sub>3</sub>) of compound 2.

Figure S12. <sup>1</sup>H-<sup>1</sup>H COSY (600 MHz, CDCl<sub>3</sub>) of compound 2.

Figure S13. HSQC (600 MHz, CDCl<sub>3</sub>) of compound 2.

Figure S14. HMBC (600 MHz, CDCl<sub>3</sub>) of compound 2.

Figure S15. NOESY (600 MHz, CDCl<sub>3</sub>) of compound 2.

Figure S16. IR spectrum of compound 2.

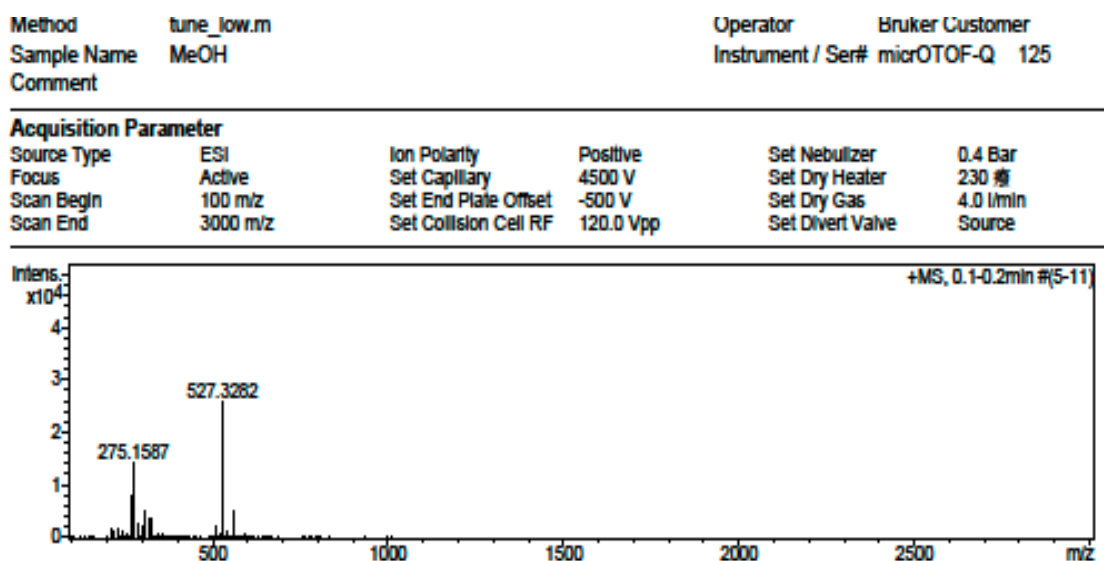

Figure S1. HR-ESI-MS spectrum of compound 1.

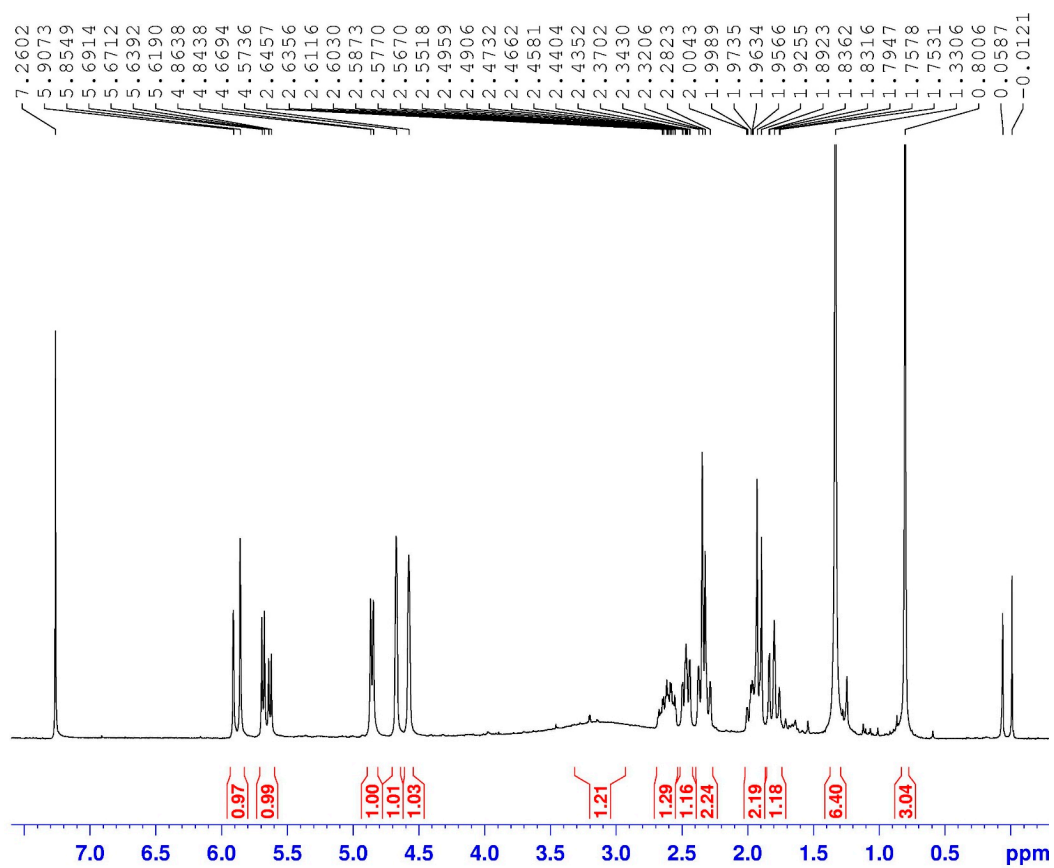Figure S2.  $^1\text{H-NMR}$  (300 MHz,  $\text{CDCl}_3$ ) of compound 1.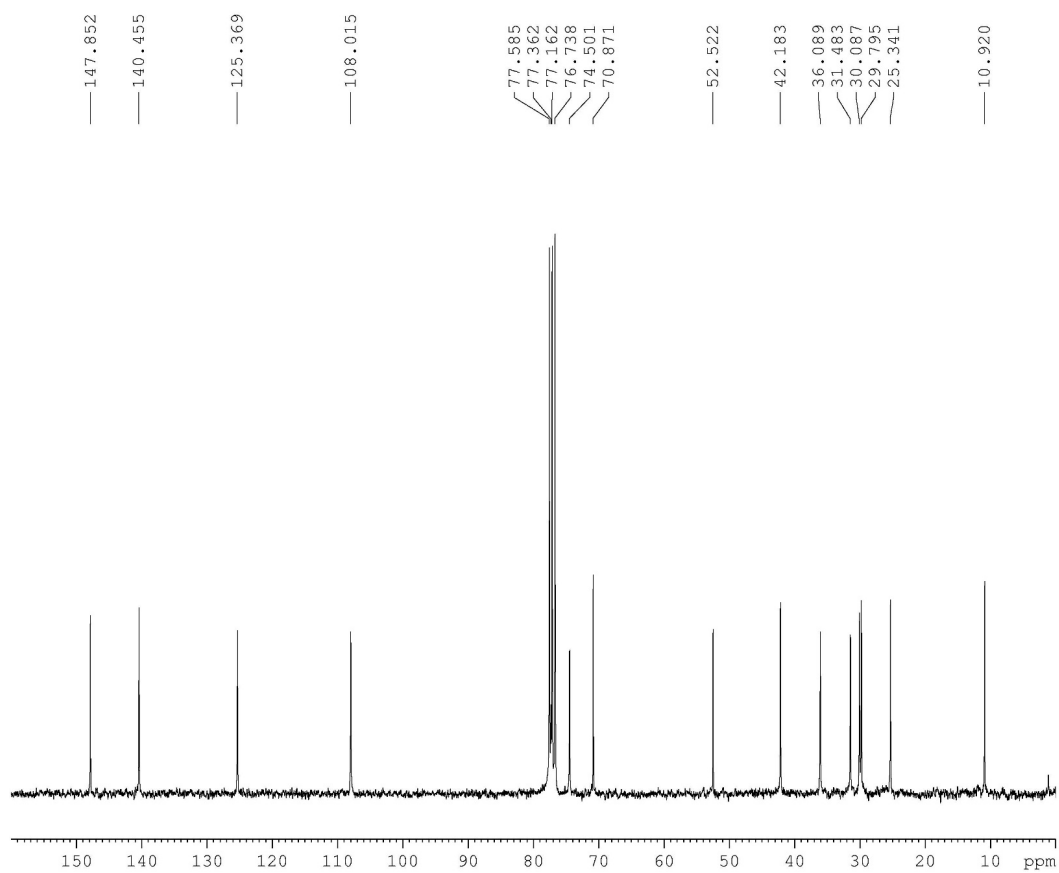Figure S3.  $^{13}\text{C-NMR}$  (75 MHz,  $\text{CDCl}_3$ ) of compound 1.

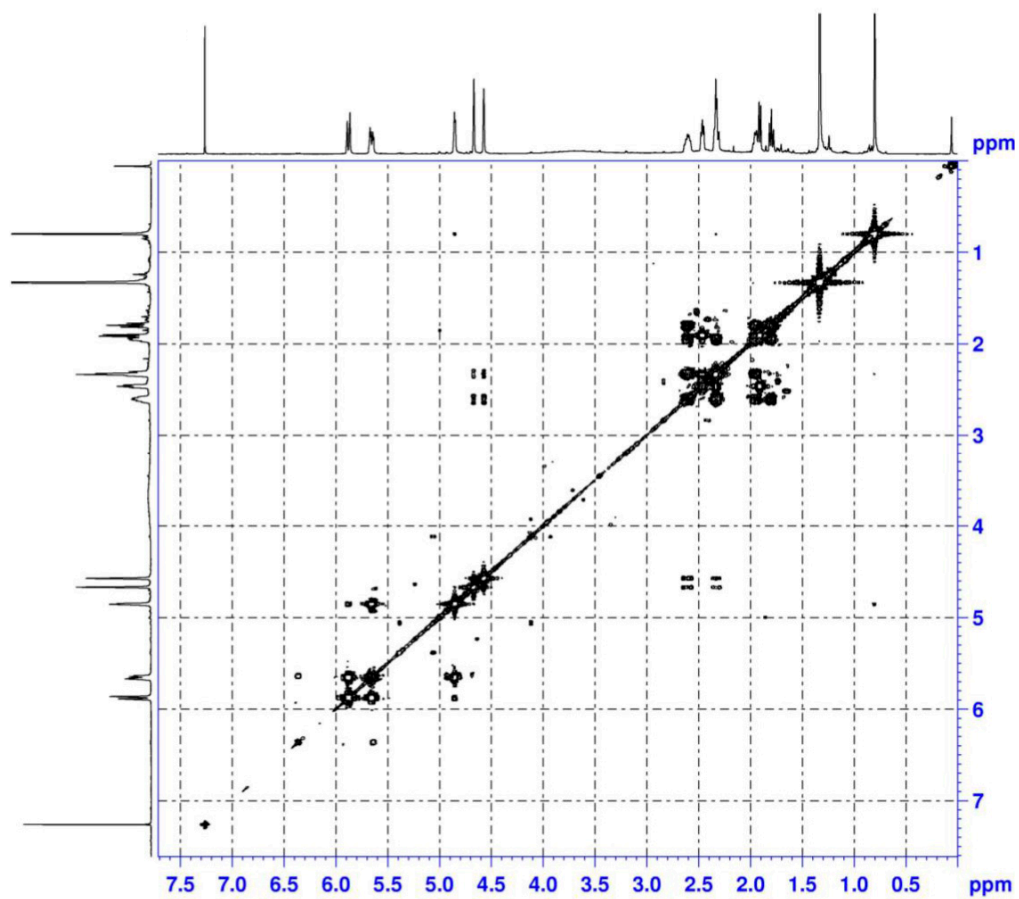

Figure S4.  $^1\text{H}$ - $^1\text{H}$  COSY (600 MHz,  $\text{CDCl}_3$ ) of compound 1.

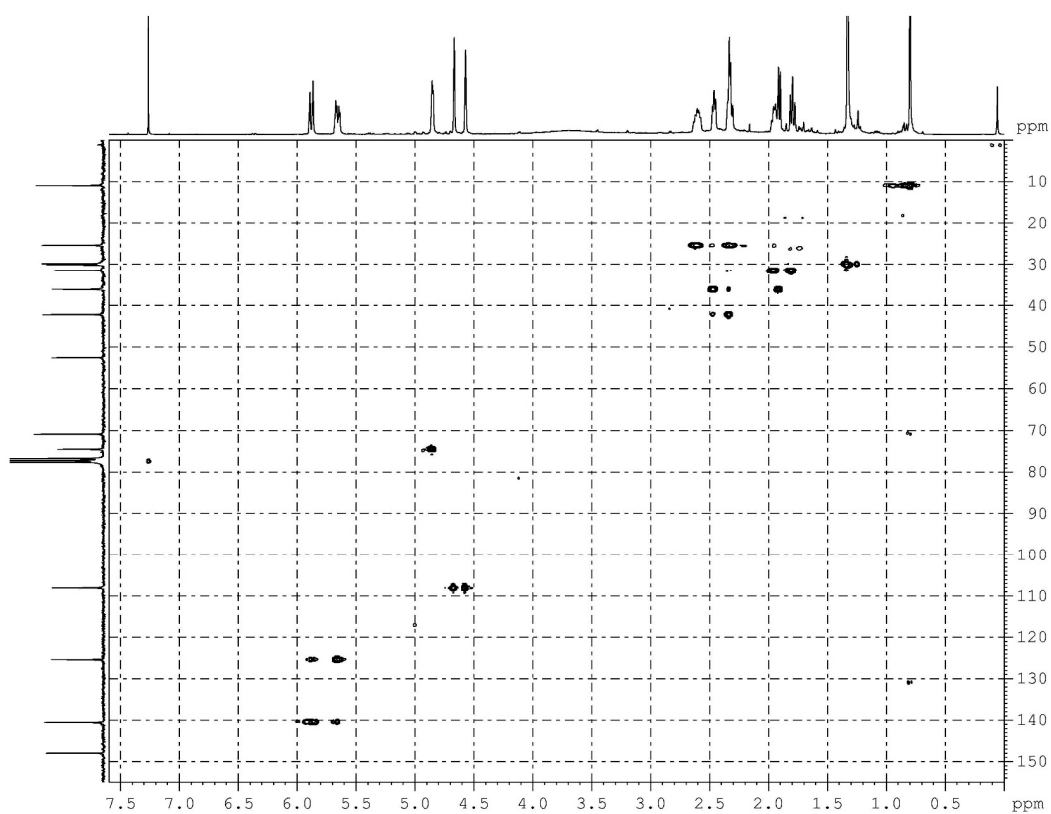

Figure S5. HSQC (600 MHz,  $\text{CDCl}_3$ ) of compound 1.

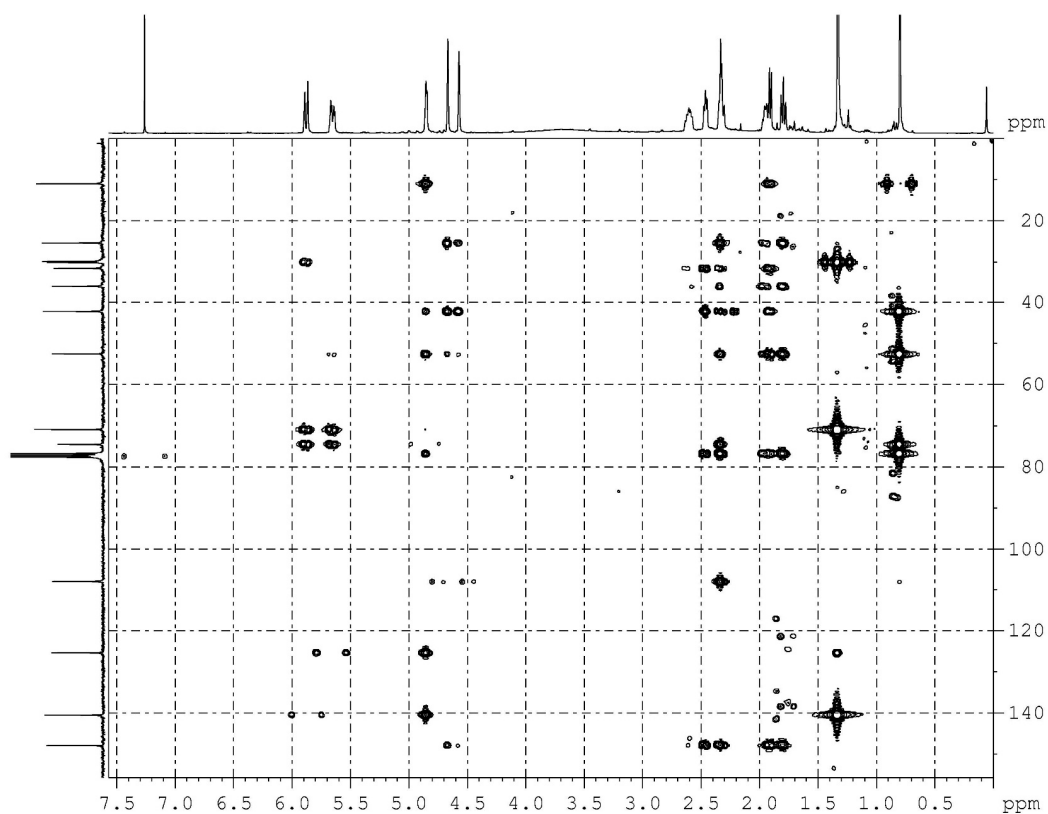

Figure S6. HMBC (600 MHz, CDCl<sub>3</sub>) of compound 1.

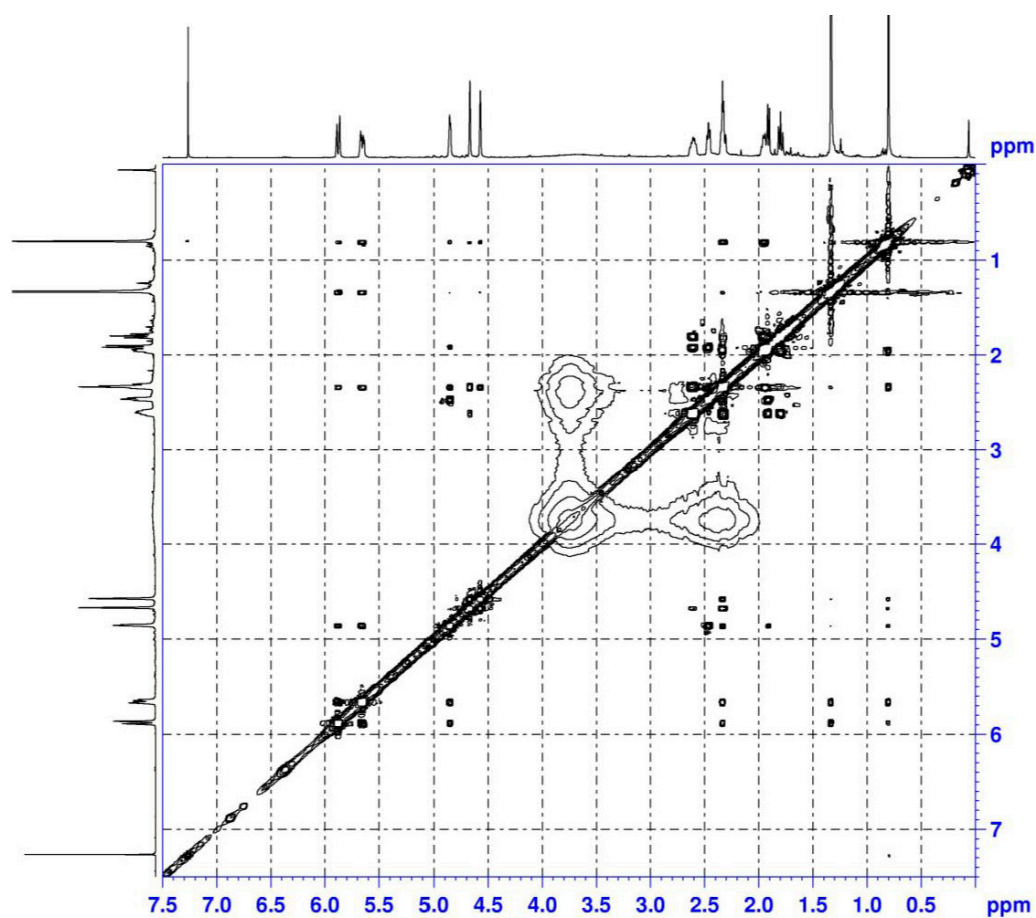

Figure S7. NOESY (600 MHz, CDCl<sub>3</sub>) of compound 1.

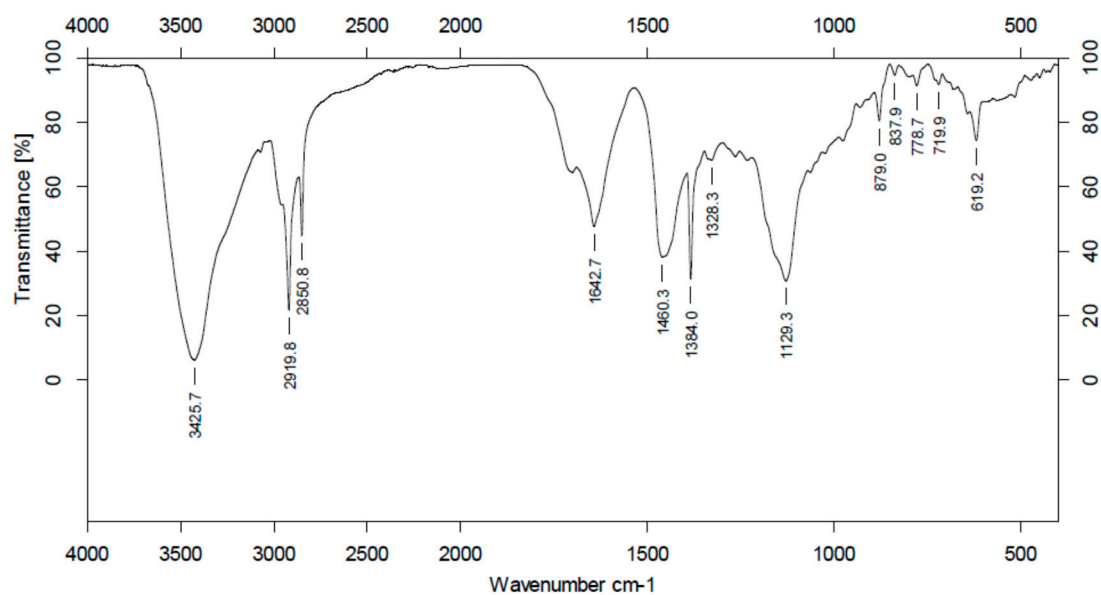

Figure S8. IR spectrum of compound 1.

|             |            |                   |                 |
|-------------|------------|-------------------|-----------------|
| Method      | tune_low.m | Operator          | Bruker Customer |
| Sample Name | MeOH       | Instrument / Ser# | micrOTOF-Q 125  |
| Comment     |            |                   |                 |

**Acquisition Parameter**

|             |          |                       |           |                  |           |
|-------------|----------|-----------------------|-----------|------------------|-----------|
| Source Type | ESI      | Ion Polarity          | Positive  | Set Nebulizer    | 0.4 Bar   |
| Focus       | Active   | Set Capillary         | 4500 V    | Set Dry Heater   | 230 度     |
| Scan Begin  | 100 m/z  | Set End Plate Offset  | -500 V    | Set Dry Gas      | 4.0 l/min |
| Scan End    | 3000 m/z | Set Collision Cell RF | 120.0 Vpp | Set Divert Valve | Source    |

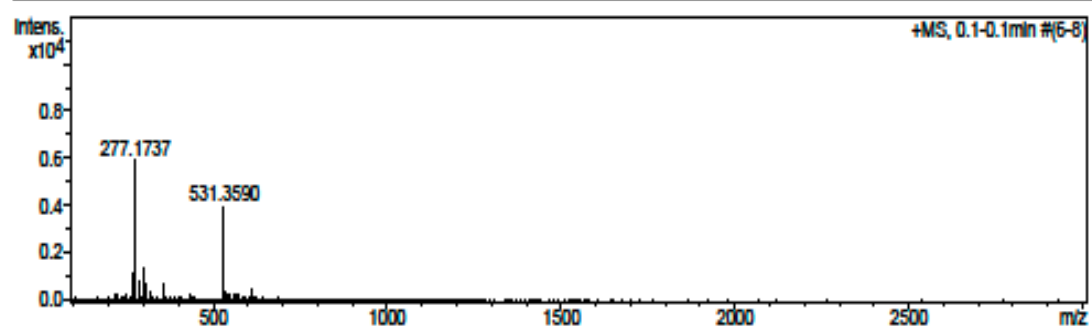

Figure S9. HR-ESI-MS spectrum of compound 2.

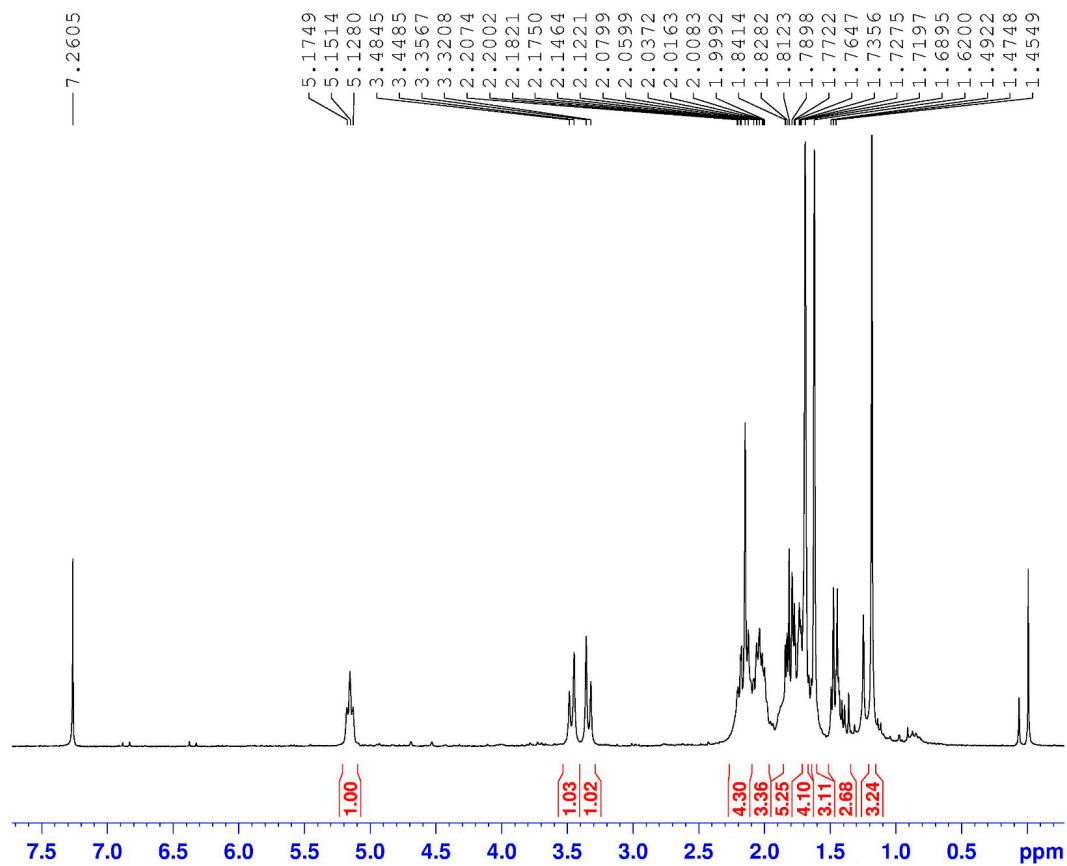Figure S10.  $^1\text{H}$  NMR (300 MHz,  $\text{CDCl}_3$ ) of compound 2.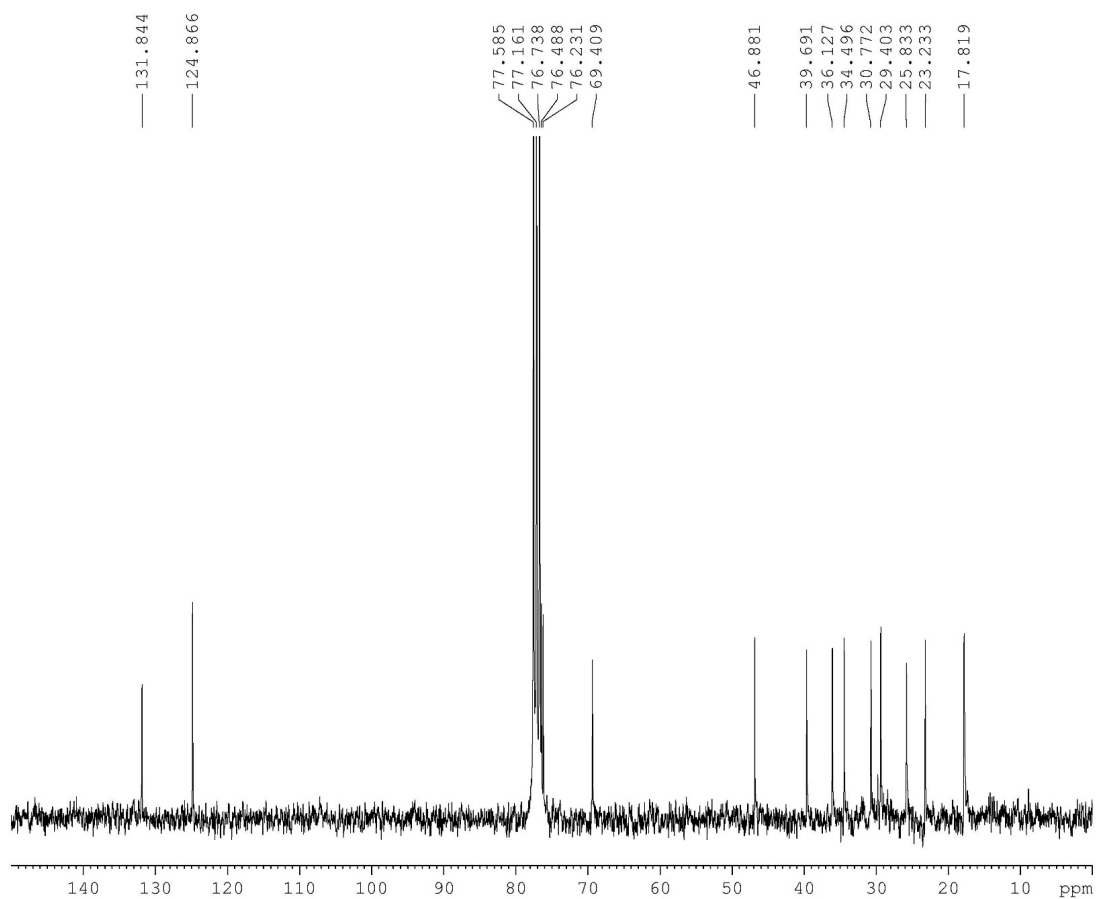Figure S11.  $^{13}\text{C}$ -NMR (75 MHz,  $\text{CDCl}_3$ ) of compound 2.



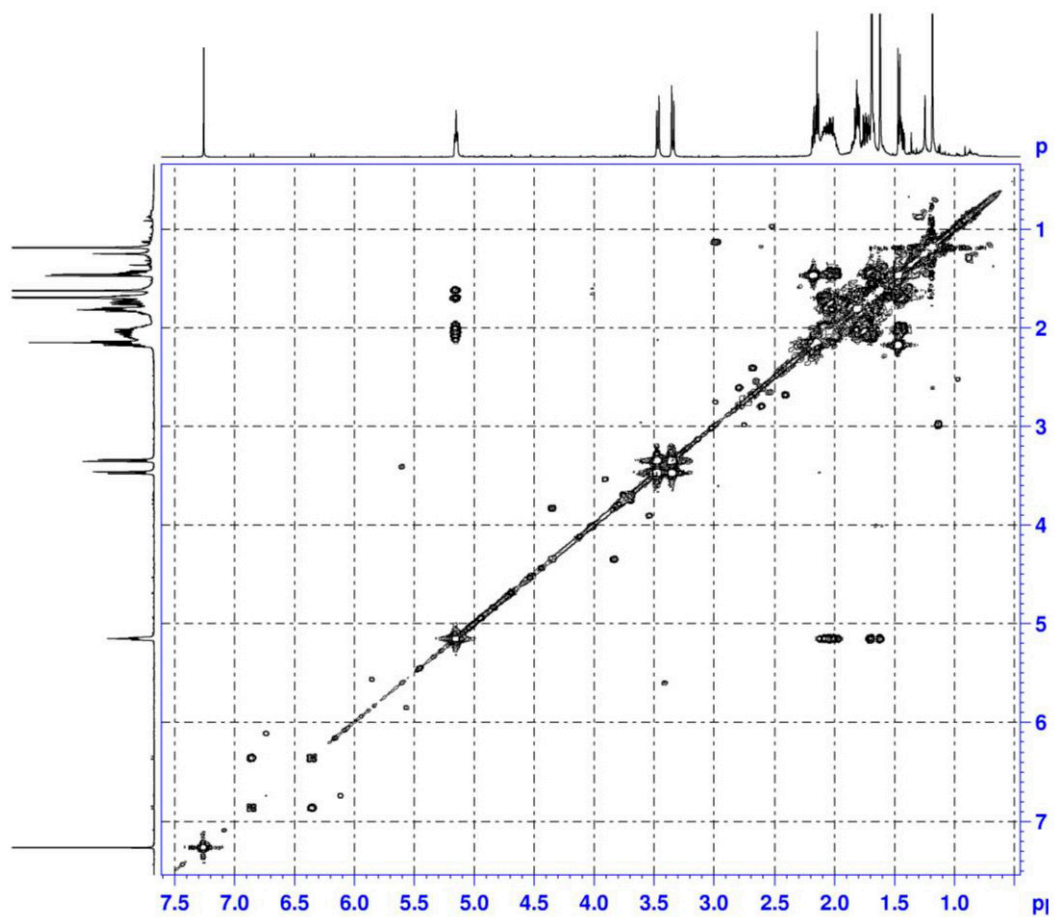

Figure S12.  $^1\text{H}$ - $^1\text{H}$  COSY (600 MHz,  $\text{CDCl}_3$ ) of compound 2.

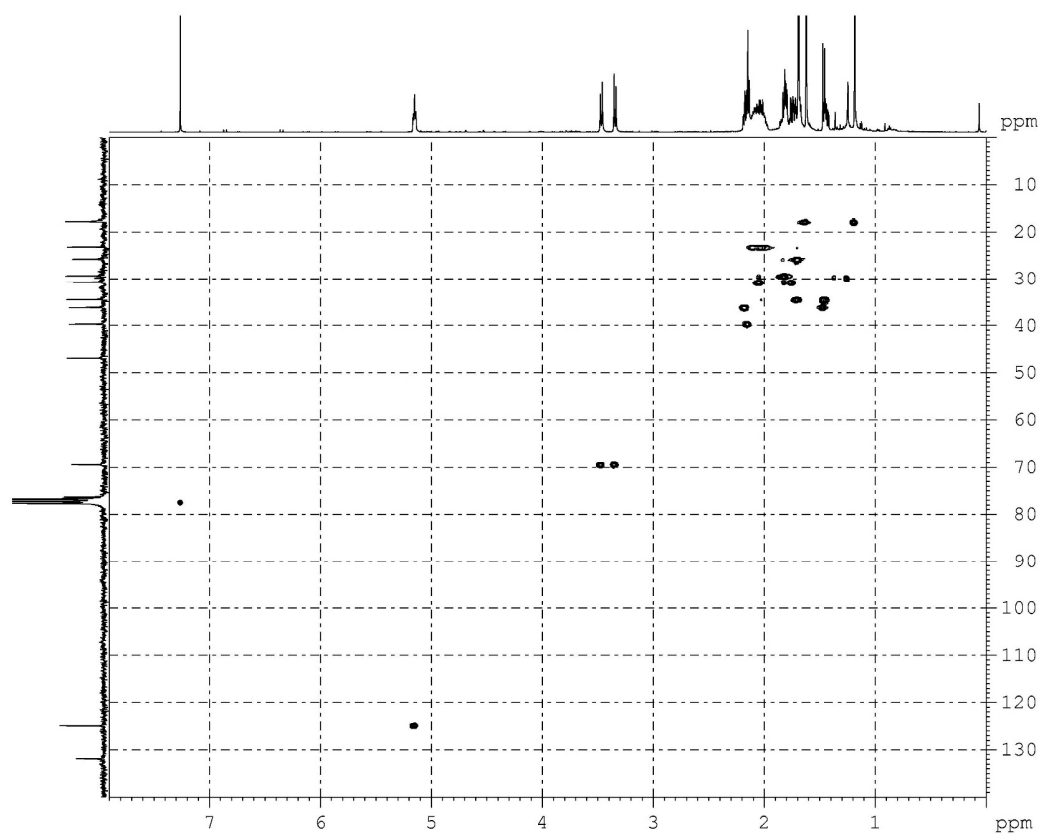

Figure S13. HSQC (600 MHz,  $\text{CDCl}_3$ ) of compound 2.

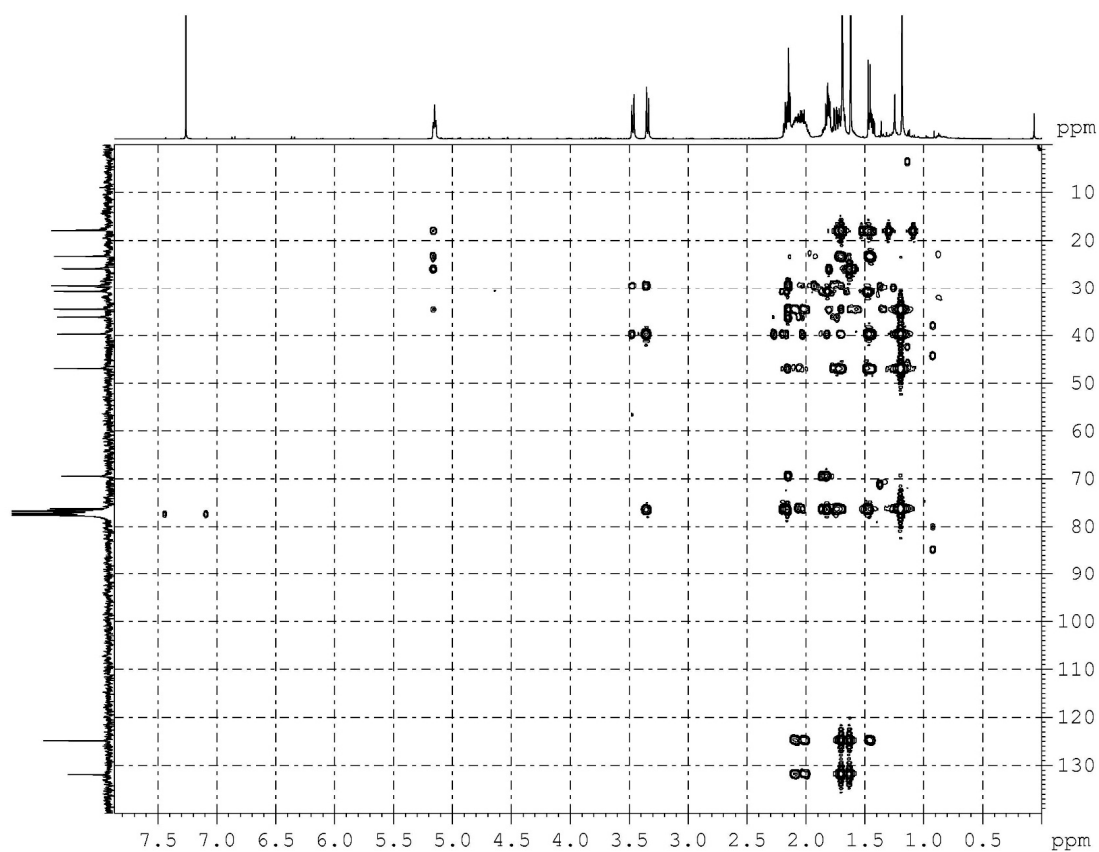

Figure S14. HMBC (600 MHz, CDCl<sub>3</sub>) of compound 2.

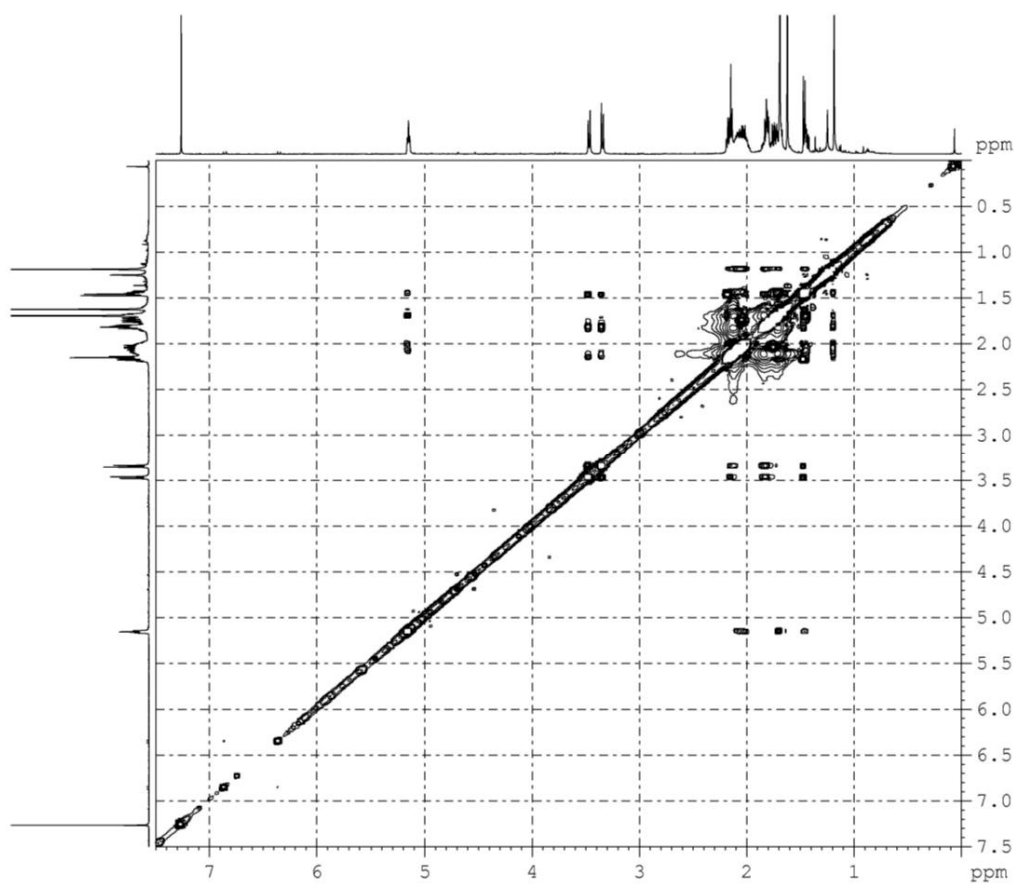

Figure S15. NOESY (600 MHz, CDCl<sub>3</sub>) of compound 2.



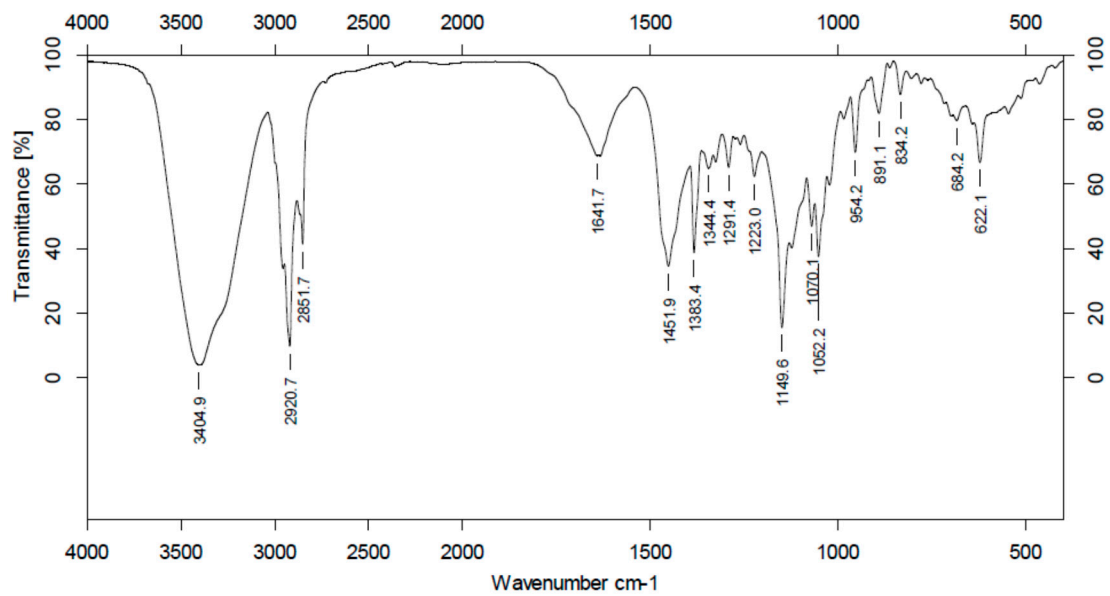

Figure S16. IR spectrum of compound 2.
